# Supplementary material for: Preparation of zinc oxide nanoparticle–reduced graphene oxide–gold nanoparticle hybrids for detection of NO2
Source: Royal Society of Chemistry journal article supplement (doi:10.1039/c5ra18680c), 2015-01-01
Supplement: c5ra18680c1.pdf [file c5ra18680c1.pdf]

## Supporting Information

### Preparation of zinc oxide nanoparticles-reduced graphene oxide-gold nanoparticles hybrids for detection of NO<sub>2</sub>

Sen Liu,<sup>a</sup> Ziyang Wang,<sup>a</sup> Yong Zhang,<sup>a</sup> Zhuo Dong,<sup>a</sup> and Tong Zhang<sup>\*a,b</sup>

<sup>a</sup> State Key Laboratory on Integrated Optoelectronics, College of Electronic Science and Engineering, Jilin University, Changchun 130012, P. R. China

<sup>b</sup> State Key Laboratory of Transducer Technology, Chinese Academy of Sciences, P. R. China

\*Corresponding author:

E-mail address: zhangtong@jlu.edu.cn (T. Zhang)

Tel.: +86 431 85168385; Fax: +86 431 85168270.

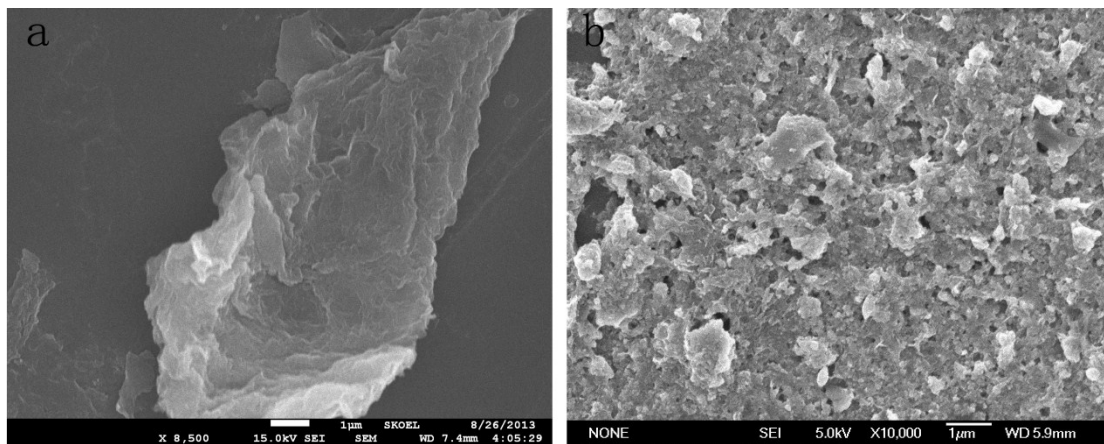

**Fig. S1** SEM images of (a) rGO and (b) ZnO-rGO hybrids.

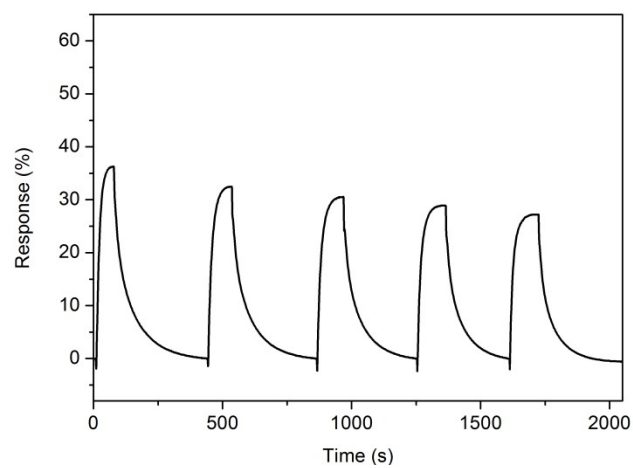

**Fig. S2** The reproducibility of temporal response of ZnO-rGO-Au hybrids exposed to 100 ppm NO<sub>2</sub> 80 °C.
